# Supplementary material for: Examining the information needed for acceptance of deintensified screening programmes: qualitative focus groups about cervical screening in Australia
Source: PubMed Central journal article supplement — BMJ Open. 2019 Oct 19;9(10):e029319. doi: 10.1136/bmjopen-2019-029319 (PMC6803149; doi:10.1136/bmjopen-2019-029319), 2019-10-19
Supplement: bmjopen-2019-029319supp002.pdf [file bmjopen-2019-029319supp002.pdf]

Supplementary material: Focus group presentation topics and key discussion questions

**Introduction to the changes to the cervical screening program**

- Had anyone heard anything about this before today?
- Do you feel that you understand the information I have just presented?
- What are your thoughts on what I have just presented?

**List of advantages and concerns about the changes generated by women**

- What do you want to know to make you feel comfortable with the changes? Is there any more information you would like?

**Presentation of concerns expressed in an online petition about the changes to the program**

- Has this information prompted any more thoughts?

**Presentation of further information about the changes**

- Did anyone have any thoughts or questions about what I have just presented? (asked at regular points throughout presentation)
- Was the information easy to understand?
- Is there any other information you would have liked?

**Following all information presented from the Department of Health website**

- How easy or hard do you think it is for people to understand the reasons for these changes?
- Do you have any ideas about how best to explain the reasons for these changes to other people?
- What could be added, removed or changed from the information I presented to you?
- How would you suggest the expansion or scaling back of screening programs are handled in the future?
- When should the public be informed of a change in policy?
- How should this information be communicated to people?
- After the information you've heard today, how will you feel when you receive your invitation for cervical screening in future?
- Has your intention to attend cervical screening changed at all because of today's session?

**Presentation of alternative slides giving evidence about the changes**

- How does this information compare with the information already presented?
- Was the information easy to understand?
- Did you have a preference over how the changes were explained to you?
